1 Title: **The Enlightenment of mainland China's epidemic situation to the world**  
2 **through the intrinsic growth rule of infected and cured cases with COVID-19**

3  
4 Chuanliang Han<sup>1△</sup>, Yimeng Liu<sup>2,3,4△</sup>, Jiting Tang<sup>2,3,4</sup>, Yuyao Zhu<sup>2,3,4</sup> and Saini Yang<sup>2,3,4\*</sup>

5 <sup>1</sup>State Key Laboratory of Cognitive Neuroscience and Learning & IDG/McGovern  
6 Institute for Brain Research, Beijing Normal University, Beijing 100875, China

7 <sup>2</sup>Key Laboratory of Environmental Change and Natural Disaster, Ministry of Education,  
8 Beijing Normal University, Beijing 100875, China

9 <sup>3</sup>State Key Laboratory of Earth Surface Processes and Resource Ecology, Beijing  
10 Normal University, Beijing 100875, China

11 <sup>4</sup>Academy of Disaster Reduction and Emergency Management Ministry of Emergency  
12 Management and Ministry of Education, Faculty of Geographical Science, Beijing  
13 Normal University, Beijing 100875, China

14  
15 <sup>△</sup>C.L.H and Y.M.L contributed equally to this work

16  
17 **\*Correspondence authors:**

18 Saini Yang,  
19 Key Laboratory of Environmental Change and Natural Disaster, Ministry of Education  
20 & State Key Laboratory of Earth Surface Processes and Resource Ecology & Academy  
21 of Disaster Reduction and Emergency Management Ministry of Emergency  
22 Management and Ministry of Education, Faculty of Geographical Science, Beijing  
23 Normal University, Beijing 100875, China

24 Email: yangsaini@bnu.edu.cn

25  
26 **Conflict of Interest:** The authors declare no competing conflicts of interest.

27 **Acknowledgements:** This study is sponsored by the National Key Research and  
28 Development Program of China (2018YFC1508903), the National Natural Science  
29 Foundation of China (41621061) and the support of International Center for

30 Collaborative Research on Disaster Risk Reduction (ICCR-DRR).

NOTE: This preprint reports new research that has not been certified by peer review and should not be used to guide clinical practice.

32 **Abstract**

33 The novel coronavirus disease (COVID-19) emerged at the end of 2019 has been  
34 controlled in mainland China so far, while it is still spreading all over the world and  
35 causing global panic. When the pandemic will end is an issue of great concern. A  
36 logistic model depicting the growth rules of infected and cured cases in mainland China  
37 may shed some light on this question. We extend this model to 31 countries outside  
38 China experiencing serious COVID-2019 outbreaks. The model well explained data  
39 from each country in our study ( $R\text{-Square} \geq 0.95$ ). For the infected case, the  
40 semi-saturation period of these countries are ranging from 63 to 170 (Mar 3 to Jun 18).  
41 For all countries in our study, the increasing rate ( $k$ ) and semi-saturation period ( $t_0$ ) of  
42 the fitted curves are negatively correlated for both infected and cured cases. The  
43 increasing rate of infected case is positively correlated with that of cured case, so is the  
44 semi-saturation period. We used a simple linear model to bridge the relationship  
45 between the increasing rules of infected and cured case. According to the connection of  
46 infected and cured growth rules which is identified from cases in China, we predicted  
47 that the semi-saturation period of the cured case outside China ranges from 82 to 196  
48 (Mar 22 to July 8) for cured cases. More importantly, we found there exists strong  
49 positive correlation between the semi-saturation period ( $t_0$ ) of infected cases and the  
50 timing of government's response, which could provide strong evidence for the  
51 effectiveness of rapid epidemic prevention in various countries.

52

53

## 54 **Introduction**

55 In December 2019, a series of cases with unknown cause of pneumonia appeared in  
56 Wuhan, the capital of Hubei Province in mainland China ([WHO<sub>a</sub>](#)). Deep sequencing  
57 analysis later from lower respiratory samples confirmed a novel coronavirus, which was  
58 firstly named as 2019 novel coronavirus (2019-nCoV) on Jan 12, 2020 and may  
59 originate from bat ([Zhou et al., 2020](#)). The coronavirus (SARS-CoV-2) has been  
60 officially renamed as COVID-19 on February 12, 2020. Human to human transmission  
61 through COVID-19 has been confirmed not only in China ([Wang et al., 2020](#); [Li et al.,](#)  
62 [2020](#); [Zhu et al., 2020](#); [Hui et al., 2020](#)), but in dozens of countries around world such as  
63 Republic of Korea ([Choi et al., 2020](#); [Ki et al., 2020](#); [Shim et al., 2020](#)), Italy  
64 ([Livingston et al., 2020](#); [Spina et al., 2020](#); [Rosenbaum, 2020](#)) and Iran ([Tuite et al.,](#)  
65 [2020](#); [Abdi, 2020](#); [Zhuang et al., 2020](#)). So far, the epidemic situation in mainland China  
66 has been effectively controlled since there are only sparse daily local new cases since  
67 Mar 19, 2020, and the cure rate in mainland China has risen up to 93.51% by April 13  
68 ([Chinese Center for Disease Control and Prevention, CCDC](#)). However, the epidemic  
69 situation outside China is much more serious than before. As of Apr 13, there have been  
70 a total of 1788665 confirmed cases of COVID-19 globally, and the death and cured rate  
71 are 6.35% and 20.45 % respectively ([Sina.com](#)). When the inflection point will come for  
72 both infection and cure outside China remains unclear. The hope and lessons for  
73 COVID-19 control from China is necessary and worth to quantify ([Azman & Luquero,](#)  
74 [2020](#)).

75

76 We applied a descriptive model that has been proved robust and stable ([Han et al., 2020](#))  
77 to analyze the data on the COVID-19 global cases (infected and cure cases in mainland  
78 China, and infected cases countries outside China). We then obtained the parameter  
79 relationship between parameters of infected and cure cases in mainland China. Further,  
80 we used that relationship to map parameter space of infected case to the parameter space  
81 of cured cases for 31 countries globally. In the end, we tried to explore the relationship

82 between the model parameters and governmental control measures.

83

## 84 **Method**

### 85 **Sources of Data:**

86 The cumulative number of confirmed and cured COVID-19 cases in mainland China  
87 was obtained from the National Health Commission of China, and the provincial Health  
88 Commission of 30 provincial administrative regions (excluded Tibet, because the only  
89 one confirmed infected COVID-19 case in Tibet has been cured on Feb. 12) in mainland  
90 China (January 10 to March 19, 2020), which is publically available. All cases were  
91 laboratory confirmed following the published standards made by the National Health  
92 Commission of China (CCDC<sub>a</sub>). The basic test procedure has been described in detail in  
93 previous work (Zhou et al., 2020; Huang et al., 2020). This dataset was partially  
94 analyzed in an initial work on this topic (Han et al., 2020).

95

96 We selected 31 countries outside China with serious coronavirus epidemic situation in  
97 our analyses (January 10 to Apr 13, 2020), whose population counts for 39.4% of the  
98 world's population (57.8% if includes China) and 81.6% of the world's infected  
99 COVID-19 cases (86.2% if includes China) (WHO<sub>a</sub>). The data of COVID-19 cases in  
100 countries outside China were obtained from the situation reports on the official website  
101 of World Health Organization (WHO<sub>a</sub>), which is publicly available. The data used in this  
102 study include the cumulative number of reported laboratory-confirmed COVID-19 cases.  
103 Countries included in our study are Republic of Korea, Japan, Australia, Singapore,  
104 which are in Western Pacific Region; Italy, Spain, France, Germany, Switzerland, the  
105 United Kingdom, Netherlands, Sweden, Denmark, Austria, Belgium, Portugal, Czechia,  
106 Finland, Ukraine, Slovakia, Bulgaria, Lithuania, which are in European Region; India in  
107 South-East Asia Region, Islamic Republic of Iran, Lebanon, which are in Eastern  
108 Mediterranean Region; United States of America, Canada, Brazil, Mexico, which are in



109 America; South Africa, Ethiopia, which are in Africa. All the laboratory-confirmed  
110 cases are determined according to the WHO standard.  
111 Governments of these countries all declared a state of national emergency, wartime, or a  
112 blockade of their borders as a result of the COVID-19 outbreak. In this study, we  
113 collected the time point of government declaration from mainstream authoritative media  
114 of each country we selected.

115

### 116 **Epidemic curve modeling**

117 In this work, we used a sigmoid-formed descriptive model (Equation (1)), which is a  
118 derivation from logistic form differential equations ([Han et al., 2020](#)).

$$119 \quad N(t) = \frac{A}{1+e^{-k(t-t_0)}} \quad (1)$$

120 where  $N(t)$  is the general form of the cumulative numbers of infected or cured patients at  
121 time  $t$ .  $A$  denotes the maximum number of infections or cures,  $k$  represents incidence  
122 growth rate,  $t_0$  is the inflection point of the sigmoid curve. This descriptive model has  
123 been verified by not only the infected, death and cured cases of COVID-19, but also the  
124 data of SARS in 2003 ([Han et al., 2020](#)). For infected case, there are three parameters ( $A$ ,  
125  $k$ ,  $t_0$ ) in the model, and for cured case, we fixed  $A$  to the subtraction of the maximum  
126 number of cumulative infections and death, which obeys the basic biological fact. It is  
127 worth mentioning that in our model,  $t_0$  is the inflection point in mathematical definition.  
128 In this paper, we assumed that  $t_0$  is the time of inflection point of epidemic situation in a  
129 region.

130

131 We processed the data and modeling with custom scripts on MATLAB (the Math  
132 Works). We adopted the nonlinear least square (NLS) algorithm for data fitting and  
133 parameter estimation.

134

135

## 136 **Results**

137 With the cumulative number of confirmed and cured cases in 30 provinces of mainland  
138 China as well as in 31 countries and above-mentioned model, all data could be well  
139 explained ( $R^2 > 0.95$ ) by the descriptive model (See Methods, [Fig. 1A-C](#), [Fig. 4A-C](#)).

140

### 141 **Relationship between infected and cured cases in mainland China**

142 The epidemic situation of COVID-19 has been controlled in China ([CCDC<sub>b</sub>](#)), with a cure  
143 rate of 93.51% ([CCDC<sub>a</sub>](#)). Time series of infected and cured cases and their fitted curves  
144 of three example provinces (provinces of Anhui, Heilongjiang, Hebei) are shown in [Fig.](#)  
145 [1A-C](#). By observing the fitted curves of all provinces in mainland China ([Supplementary](#)  
146 [Figure S1](#)), we found the increasing rate ( $k$ ) of infected case is larger than that of cured  
147 case and the semi-saturation period ( $t_0$ ) of infected cases is shorter than that of cured  
148 cases.

149 As shown in Figure 2, the parameter space of  $k$  and  $t_0$  are separated for infected (red  
150 circle) and cured cases (blue circle), and there is a significant negative correlation (for  
151 infected case,  $r = -0.46$ ,  $p = 0.0103$ ; for cured case,  $r = -0.56$ ,  $p = 0.0012$ ; Pearson correlation).  
152 As we compared these two parameters of infected and cured cases respectively, we  
153 found infection case has larger ( $t = 6.9136$ ,  $p < 10^{-7}$ , right-tailed test) increasing rate ([Fig.](#)  
154 [2B](#)) but smaller ( $t = -37.271$ ,  $p < 10^{-25}$ , left-tailed test) semi-saturation period ([Fig. 2C](#)) than  
155 that of cured cases. The increasing rate of infected and cured case is significant  
156 positively correlated ( $r = 0.38$ ,  $p = 0.0359$ , Pearson Correlation), so is the semi-saturation  
157 period of infected and cured case ( $r = 0.66$ ,  $p = 0.0001$ , Pearson Correlation). Each of them  
158 could be fitted to a linear model, with a slope and intercept of 0.36 (CI: [0.0268, 0.698])  
159 and 0.1 (CI: [0.014, 0.191]), respectively (panel B), and that of panel C is 1.06 (CI: [0.59,  
160 1.54]) and 15.36 (CI: [-0.85, 31.56]).

161

### 162 **Intrinsic growth rules of COVID-19 infections outside China**

163 With the dataset of infected case in mainland China, there shows time stability of this

164 model (Fig. 3). An example of Fujian province is shown in Figure 3A. It is clear that as  
165 the increase of length of time-series data, the fitting curves converges better to the actual  
166 number of cases (black dots).

167 We defined an index, the minimum time length (MTL), to measure how much data is  
168 necessary to produce stable output. This index is the time length with which the change  
169 of parameter value ( $k$  or  $t_0$ ) is less than 5% in two consecutive days. With the data of 30  
170 provinces in China, we found that the MTL for increasing rate ( $k$ ) is 15 days (Fig. 3B)  
171 and for semi-saturation period ( $t_0$ ), is 26 days (Fig. 3C). This result provides some hint  
172 on how much data is necessary to measure the epidemic situation.

173

174 After identifying the relationship between the increasing rate and the semi-saturation  
175 period, we applied this relationship to the COVID-19 cases from 31 countries. We  
176 applied the descriptive model to fit the data of the cumulative infected cases in each of  
177 the 31 countries. Figure 4 illustrates three countries' time-series data of infection  
178 (Canada, Germany and Iran, Fig. 4A-C) (See Supplementary Figure S2 for all 31  
179 countries' plots). All data series of infected case could be well explained by our model  
180 ( $R^2 > 0.95$ ). The average change rate of these parameters is already lower than 5% (Fig 4  
181 D-F) which indicates the parameters we estimated from the model is stable. We noticed  
182 that the increasing rate of 31-country cases does not have a significant difference  
183 ( $t=1.197, p=0.237$  two-tailed test) with that of Chinese provinces, but the 31-country  
184 cases have significantly longer ( $t=-17.4819, p < 10^{-20}$ , right-tailed test) semi-saturation  
185 period. The numbers indicated that the  $t_0$  of infections in 31 countries is averaged at 98  
186 (std: 20.5), and the date matched to which is around Apr 7 (ranging from Mar 3 to Jun  
187 18).

188

### 189 **Prediction for growth rules of cured COVID-19 cases and its relation to the timing** 190 **of governmental control measures**

191 By observing the increasing rate ( $k$ ) and semi-saturation period ( $t_0$ ) of infected case in 31

192 countries, we found there was a weak negative correlation ( $r=-0.63$ ,  $p=0.0001$ , Pearson  
193 Correlation) (Fig. 5) between these two parameters, which shows similar tendency with  
194 results of provinces in mainland China (Fig. 2B). To predict the increasing rate ( $k$ ) and  
195 inflection point ( $t_0$ ) of the cured COVID-19 cases outside China, we mapped the  
196 parameter space of infected cases into the parameter space of cured cases, based on the  
197 parameter relationship between infected cases and cured cases obtained from China (Fig.  
198 2BC). For the 31 countries, the increasing rate ranges from 0.08 to 0.45. The mean  $t_0$  of  
199 the fitted cured cases curves is 119.71 (std: 21.73), which means the mean  
200 semi-saturation period ( $t_0$ ) for these 31 countries will come around Apr. 29, 2020  
201 (ranging from Mar 22 to July 8).

202

203 To explore the practical implication of these parameters, we took the timing of  
204 governmental emergency control measures related to COVID-19 as a variable to analyze  
205 its relationship with the key parameters (Fig. 6). We found the Semi-Saturation Period  
206 (SSP) showed a significant positive correlation ( $r=0.73$ ,  $p<0.0001$ , Spearman correlation)  
207 with the timing of governmental control measures (Fig. 6 BE), and  $k$  showed a marginal  
208 significant negative correlation ( $r=-0.3$ ,  $p=0.0925$ , Spearman correlation), while the  
209 increasing rate or the maximum of infected number do not show strong correlation  
210 ( $r=0.02$ ,  $p=0.91$ , Spearman correlation) with the control measures' timing (Fig. 6  
211 ACDF). China released the earliest national control measures to prevent the spread of  
212 COVID-19 (on Jan. 23) and its  $t_0$  is the lowest (Figure 5, red circle). We also noticed  
213 that the timing of governmental emergency control measure is significantly earlier than  
214 SSP (Fig. 6B) ( $t=2.99$ ,  $p=0.0043$ , two-tailed test) in time, which indicates that most of  
215 the selected countries have taken measures at the early phase of the outbreak.

216

217

## 218 **Discussion**

219 We compared the relationship between growth characteristics of infected and cured case  
220 of 30 provinces in mainland China based on the data from Jan 20 to Mar 29, 2020,  
221 which are positively correlated (Fig. 2 BC). Further, we explained the data from 31  
222 countries using the same model (See Methods). We predicted their increasing rate ( $k$ )  
223 and semi-saturation period ( $t_0$ ) of cure case based on the knowledge of data from China.  
224 It is worth mentioning that there is a strong correlation between these parameters and the  
225 timing of governmental policy on COVID-19.

226

## 227 **Comparison with previous work**

228 Different from models like SIR or SEIR applied in COVID-19 (Li et al., 2020; Wang et  
229 al., 2020; Tian et al., 2020), our model is relatively simple, but robust. This work is an  
230 extension of our previous work (Han et al., 2020), we have verified that our model well  
231 explains the data in various geographic space of mainland China, as well as provided  
232 robust results with different lengths of time series (between 30 and 40 days).  
233 This model is able to capture the features of macroscopic dynamic of the epidemics  
234 worldwide ( $R^2 > 0.95$ ) (Fig. 4) and we quantitatively investigated the minimum data  
235 length to produce stable output (Fig. 3). By now, the domestic infected cases in China is  
236 very limited, which is consistent with our prediction results. The cumulative number of  
237 infected and cured cases are almost saturated, and this means the spread of the virus has  
238 been effectively controlled, thus we believe that the parameters estimated in this work  
239 for Chinese provinces are reliable (Fig. 1A-C). The characteristics of two curves can  
240 depict the dynamic macroscopic features of the epidemic situation. Moreover, we  
241 extended this model to the data in each of these 31 countries (Fig 4 A-C), and found the  
242 sigmoid model could also fit the data very well ( $R^2 > 0.95$ ) (Fig 4 A-C).

243

## 244 **Relationship among model parameters and the prediction of the cured cases**

245 We noticed that semi-saturation period of infected and cured cases in China showed a

246 positive correlation ( $p$ -value = 0.0001). This phenomenon obeys the common sense,  
247 since the cure is always later than infection when a new virus comes. Although the  
248 positive correlation between increasing rate of infected and cured cases is significant  
249 ( $p$ -value = 0.0359), we noticed the correlation is much lower than that of semi-saturation  
250 period. This result is reasonable, since the reasons cause the ascending increasing rate of  
251 infected case are totally different from that of cured case. So that correlation may not be  
252 that strong. As we compared the  $k$  and  $t_0$  in any specific case no matter in mainland  
253 China or worldwide region (Fig. 5), we found significant negative correlations. This is  
254 consistent with our initial work (Han et al., 2020). For negative correlation of  $k$  and  $t_0$  in  
255 cured cases, it could also be explained as when the increasing rate ( $k$ ) of the cured case  
256 is larger, it will be faster to cure most patients.

257

## 258 **Suggestion for governments around the world on the prevention and control of** 259 **COVID-19**

260 More importantly, we found there is a strong correlation between the timing of  
261 governmental control measures for COVID-19 in 31 countries and the semi-saturation  
262 period estimated (Fig 6 BE). This indicates the early implementation of the  
263 government's prevention and control policy effectively shortened the turning point of  
264 the epidemic. Taken China as an example, when the COVID-19 outbreak in Wuhan, the  
265 strict isolation policy was announcement on Jan. 23, and the inflection point there was  
266 around Feb 9, 2020, the time lag was 17 days. Another result showed that the time of  
267 governmental policy is significantly shorter than the inflection time point of infection,  
268 which is also a strong reference for governments of all countries to take control  
269 measures as early as possible.

270

## 271 **Reference**

- 272 Sina, [https://news.sina.cn/zt\\_d/yiqing0121](https://news.sina.cn/zt_d/yiqing0121)
- 273 WHO<sub>a</sub>, <https://www.who.int/docs/default-source/coronaviruse/situation-reports>
- 274 CCDC<sub>a</sub> Prevention, C. C. f. D. C. a. Prevention and control measures of COVID-19,  
275 <<http://www.nhc.gov.cn/jkj/s3577/202002/a5d6f7b8c48c451c87dba14889b30147/files/3514cb996ae24e2faf65953b4ecd0df4.pdf>> (2020).  
276
- 277 CCDC<sub>b</sub> [http://www.nhc.gov.cn/xcs/yqfkdt/gzbd\\_index.shtml](http://www.nhc.gov.cn/xcs/yqfkdt/gzbd_index.shtml)
- 278 Li R, Pei S, Chen B, Song Y, Zhang T, Yang W, Shaman J (2020) Substantial  
279 undocumented infection facilitates the rapid dissemination of novel coronavirus  
280 (SARS-CoV2). *Science*.
- 281 Zhou P et al. (2020) A pneumonia outbreak associated with a new coronavirus of  
282 probable bat origin. *Nature*.
- 283 Wang D, Hu B, Hu C, Zhu F, Liu X, Zhang J, Wang B, Xiang H, Cheng Z, Xiong Y,  
284 Zhao Y, Li Y, Wang X, Peng Z (2020) Clinical Characteristics of 138 Hospitalized  
285 Patients With 2019 Novel Coronavirus-Infected Pneumonia in Wuhan, China. *JAMA*.
- 286 Li Q et al. (2020) Early Transmission Dynamics in Wuhan, China, of Novel  
287 Coronavirus-Infected Pneumonia. *N Engl J Med*.
- 288 Zhu N, Zhang D, Wang W, Li X, Yang B, Song J, Zhao X, Huang B, Shi W, Lu R, Niu P,  
289 Zhan F, Ma X, Wang D, Xu W, Wu G, Gao GF, Tan W, China Novel Coronavirus I,  
290 Research T (2020) A Novel Coronavirus from Patients with Pneumonia in China, 2019.  
291 *N Engl J Med*.
- 292 Hui DS, E IA, Madani TA, Ntoumi F, Kock R, Dar O, Ippolito G, McHugh TD, Memish  
293 ZA, Drosten C, Zumla A, Petersen E (2020) The continuing 2019-nCoV epidemic threat  
294 of novel coronaviruses to global health - The latest 2019 novel coronavirus outbreak in  
295 Wuhan, China. *Int J Infect Dis* 91:264-266.
- 296 Choi SC, Ki M (2020) Estimating the reproductive number and the outbreak size of  
297 Novel Coronavirus disease (COVID-19) using mathematical model in Republic of  
298 Korea. *Epidemiol Health*:e2020011.
- 299 Ki M, nCo VT (2020) Epidemiologic characteristics of early cases with 2019 novel  
300 coronavirus (2019-nCoV) disease in Republic of Korea. *Epidemiol Health*:e2020007.
- 301 Shim E, Tariq A, Choi W, Lee Y, Chowell G (2020) Transmission potential and severity  
302 of COVID-19 in South Korea. *Int J Infect Dis*.
- 303 Abdi M (2020) Coronavirus disease 2019 (COVID-19) outbreak in Iran; actions and  
304 problems. *Infect Control Hosp Epidemiol*:1-5.
- 305 Tuite AR, Bogoch, II, Sherbo R, Watts A, Fisman D, Khan K (2020) Estimation of  
306 Coronavirus Disease 2019 (COVID-19) Burden and Potential for International  
307 Dissemination of Infection From Iran. *Ann Intern Med*.
- 308 Zhuang Z, Zhao S, Lin Q, Cao P, Lou Y, Yang L, He D (2020) Preliminary estimation of  
309 the novel coronavirus disease (COVID-19) cases in Iran: A modelling analysis based on

310 overseas cases and air travel data. *Int J Infect Dis*.  
311 Livingston E, Bucher K (2020) Coronavirus Disease 2019 (COVID-19) in Italy. *JAMA*.  
312 Rosenbaum L (2020) Facing Covid-19 in Italy - Ethics, Logistics, and Therapeutics on  
313 the Epidemic's Front Line. *N Engl J Med*.  
314 Spina S, Marrazzo F, Migliari M, Stucchi R, Sforza A, Fumagalli R (2020) The response  
315 of Milan's Emergency Medical System to the COVID-19 outbreak in Italy. *Lancet*  
316 395:e49-e50.  
317 Han C, Liu Y, Yang S (2020) Intrinsic growth rules of patients infected, dead and cured  
318 with 2019 novel coronavirus in mainland China. medRxiv:2020.2002.2023.20024802.  
319 Zhou P et al. (2020) A pneumonia outbreak associated with a new coronavirus of  
320 probable bat origin. *Nature*.  
321 Huang C et al. (2020) Clinical features of patients infected with 2019 novel coronavirus  
322 in Wuhan, China. *Lancet*.  
323 Li R, Pei S, Chen B, Song Y, Zhang T, Yang W, Shaman J (2020) Substantial  
324 undocumented infection facilitates the rapid dissemination of novel coronavirus  
325 (SARS-CoV2). *Science*.  
326 Wang H, Wang Z, Dong Y, Chang R, Xu C, Yu X, Zhang S, Tsamlag L, Shang M,  
327 Huang J, Wang Y, Xu G, Shen T, Zhang X, Cai Y (2020) Phase-adjusted estimation of  
328 the number of Coronavirus Disease 2019 cases in Wuhan, China. *Cell Discov* 6:10.  
329 H. Tian et al., *Science* 10.1126/science.abb6105 (2020).  
330 Azman AS, Luquero FJ (2020) From China: hope and lessons for COVID-19 control.  
331 *Lancet Infect Dis*.  
332  
333  
334  
335



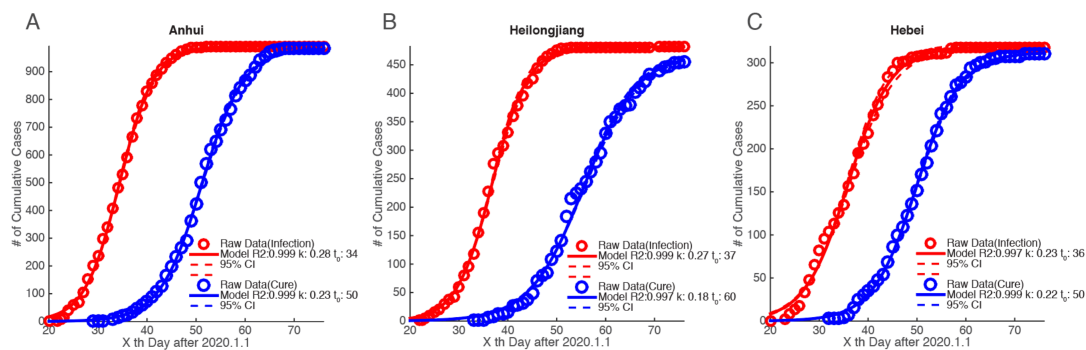

336

337 Figure 1 Example provinces for the time series of infected and cured cases with  
 338 corresponding fitted curve in mainland China

339 A-C shows three example cases in three provinces (Anhui, Heilongjiang and Hebei). The horizontal axis  
 340 in each panel denotes the  $x^{\text{th}}$  day after January 1, 2020. The vertical axis in each panel is the cumulative  
 341 number of infected (red circles) and cured case (blue circles). The red and blue line are the fitting  
 342 curves by the sigmoid model, and the dashed red and blue curves mark the 95% confidence interval of the fitting  
 343 curves.

344

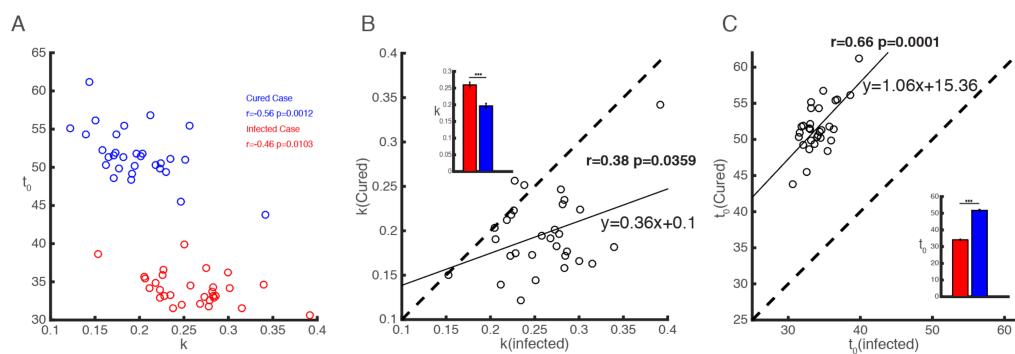

345

346 Figure 2 Relationship between intrinsic rules for infected and cured case in mainland  
 347 China

348 Panel A shows the scatter plot of increasing rate ( $k$ ) and semi-saturation period ( $t_0$ ) for infected (red circles)  
 349 and cured case (blue circles).

350 Panel B is the scatter plot of increasing rate ( $k$ ) of infected and cured case (black circles), the dashed line  
 351 is the diagonal line of the coordinate system (the same for Panel C). The relation between  $k$  of infected  
 352 and cured cases is modeled with a linear function, which is shown as the black curve. The bar graph  
 353 shown in northwest corner demonstrates the difference between  $k$  of infected and cured cases.

354 Panel C shows the scatter plot of semi-saturation period ( $t_0$ ). The black curve is the linear function  
 355 estimated based on the relation between infected and cured case. And the bar graph shown in southeast  
 356 corner demonstrates difference between  $t_0$  of infected and cured cases.

357

358

359

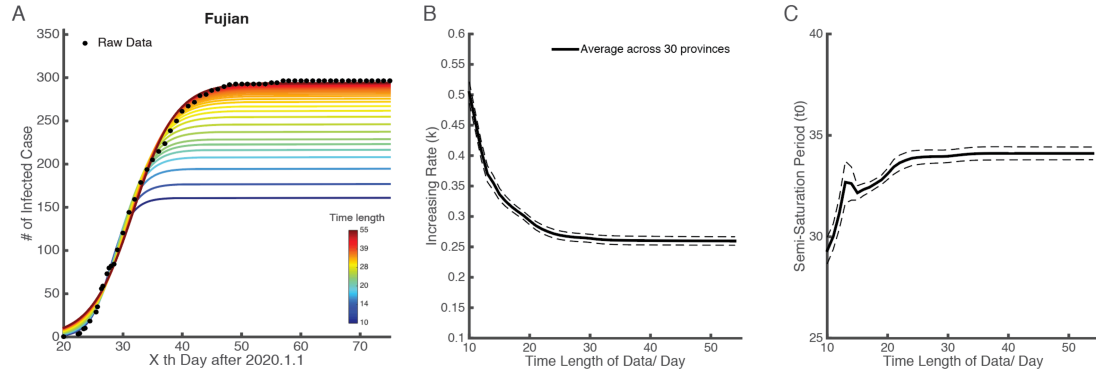

360  
361  
362  
363  
364  
365  
366  
367  
368  
369  
370  
371

### Figure 3 Time stability of logistic model in infected case of Chinese mainland

Panel A is an example case in Fujian province. The horizontal axis in each panel denotes the x<sup>th</sup> day after January 1, 2020. The vertical axis in each panel is the cumulative number of infected (black dots). The lines with different colors are the fitting curve by the logistic model using data with different time length as shown in color bar in the southeast corner. Panel B and C illustrates how estimated parameters (k and t<sub>0</sub>) changes with increase of the data's time length. The black curve shows the average of increasing rate (k) across 30 provinces in mainland China changing with time length of data and the dashed line marks its standard error.

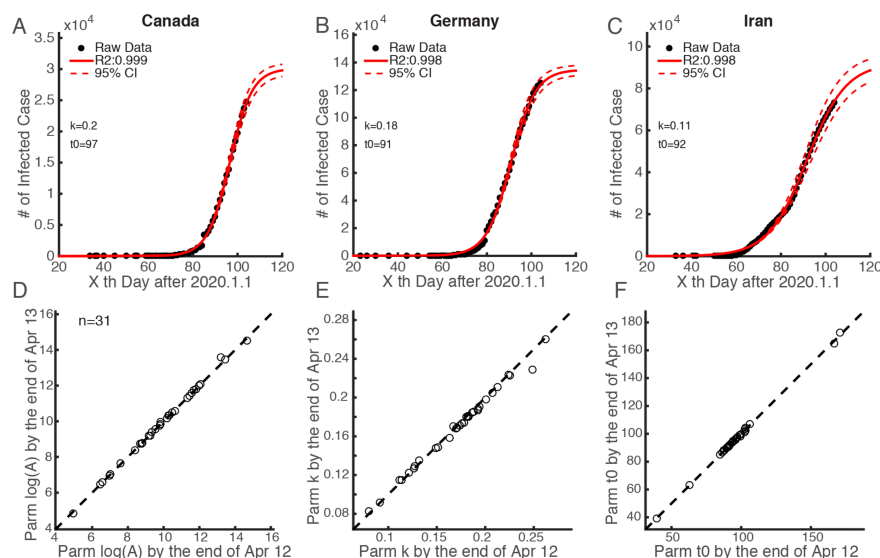

372

373 Figure 4 Example countries for the time series of infected cases with corresponding  
 374 fitted curve around world and its temporal stability

375 Panel A-C show infected cases and their fitted curves of Australia, Italy and Iran. The horizontal axis is  
 376 the  $x^{\text{th}}$  day after Jan 1, 2020. The vertical axis denotes the number of infected cases in corresponding  
 377 country. The black dots in each panel are raw data of the cumulative number of infected cases. The red  
 378 line is the fitted curves by our descriptive model. The dashed red lines mark the 95% confidence interval  
 379 of the fitted curves. Panel D-F show the difference of parameters estimated from relative longer (by the  
 380 end of Jun 13) and shorter (by the end of Apr 12) time series data, each dot denotes for one country.

381

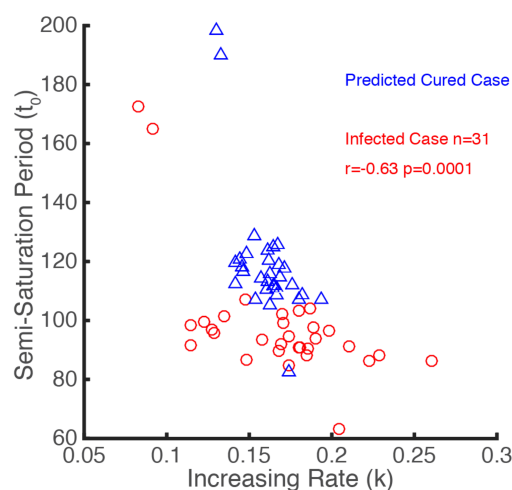

382

383 Figure 5 Prediction for intrinsic rule of cured case around world based on Chinese  
 384 enlightenment

385 The scatter plot of increasing rate ( $k$ ) and semi-saturation period ( $t_0$ ) for infected cases is showed in red  
 386 circles. Based on the linear model shown in Fig 2BC, a prediction of  $k$  and  $t_0$  for cured case is plotted as  
 387 blue circles.

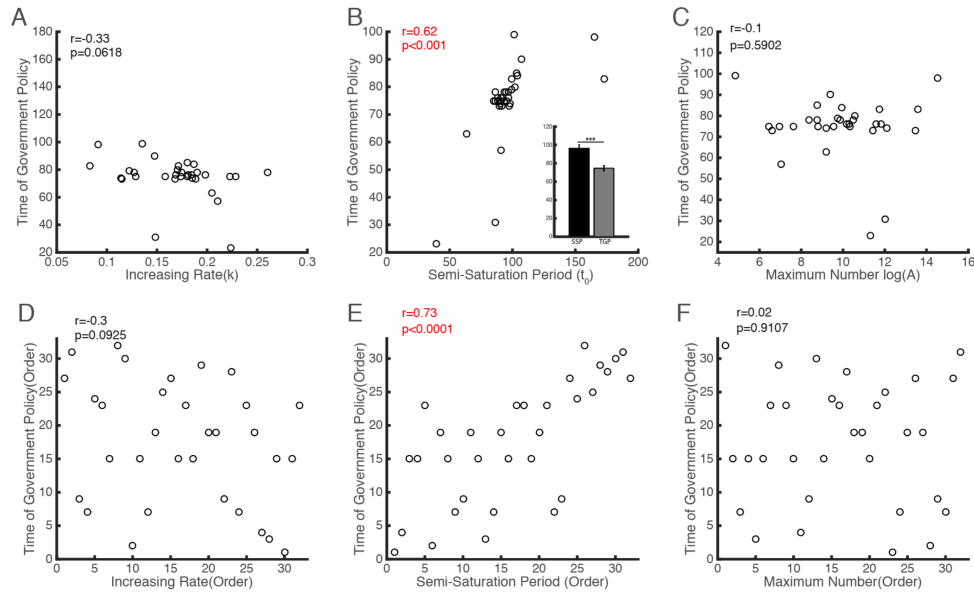

388

389 Figure 6 Relationship between time of government policy from each countries and  
390 parameters estimated from the model

391 Panel A-C show the scatter plot of the time of government measures and the model parameters of infected  
392 case (k,  $t_0$  and A, respectively). In the southeast corner of Panel B, a bar graph was shown to indicate the  
393 difference between timing of government measures (grey bar) and semi-saturation period (SAP, black  
394 bar).

395 D-F shows the same data of A-C but in the order form. The red circle in six panels denotes China.

396

397

398

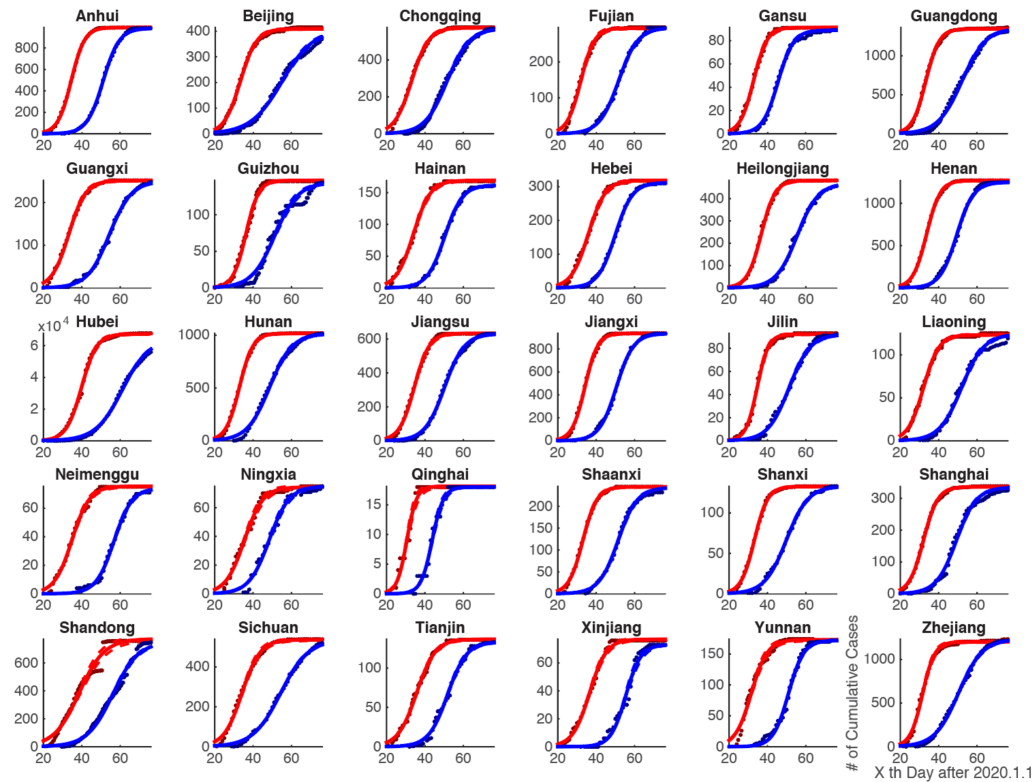

399

400 **Supplement Figure S1 Intrinsic growth rules of patients infected with 2019 novel**  
401 **coronavirus in all provinces of mainland China**

402 The deep red and blue dots in each panel are raw data of the cumulative infected and  
403 cured cases. The red and blue line is the corresponding fitted curves by our descriptive  
404 model.

405

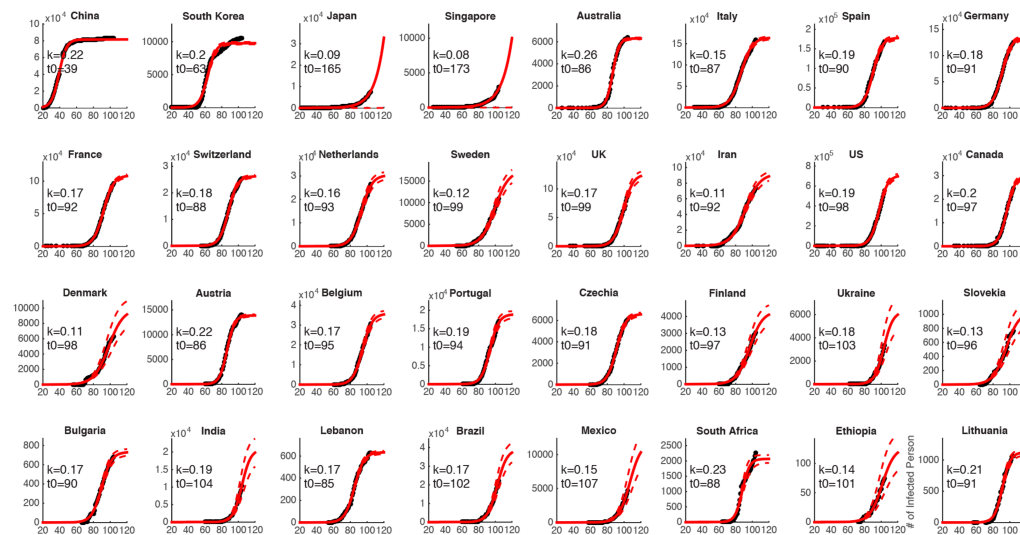

406

407

### Supplement Figure S2 Intrinsic growth rules of patients infected with 2019 novel coronavirus in 31 countries around world

408

409

The black dots in each panel are raw data of the cumulative infected cases. The red line is the fitted curve by our descriptive model.

410

411

412

413
